# Supplementary material
Source: PubMed Central journal article supplement (PMC2268221)
Supplement: i1536-5050-096-02-0101-s1-a1.pdf [file i1536-5050-096-02-0101-s1-a1.pdf]

## Hispanics' use of Internet health information: an exploratory study

Ninfa Peña-Purcell, PhD, CHES

### APPENDIX

#### Sample of questions used for this investigation

Q404 How concerned are you about the reliability of health information you access on the Internet: very concerned, somewhat concerned or not at all concerned?

Q406 How good do you think you are at assessing whether or not a website has reliable health information: excellent, very good, good, fair or poor?

Q412/413 I am going to read you a few statements about health-related information available to the public on the Internet. For each, please tell me whether you strongly agree, somewhat agree, somewhat disagree or strongly disagree.

- A. Encourages patients to diagnose and treat their own symptoms without medical advice.
- B. Encourages patients to follow treatment instructions or advice from their doctors.
- C. Improves people's understanding of medical conditions and treatments.
- D. Gives patients confidence to talk to their doctor about their concerns.
- E. Promotes unnecessary visits to doctors.
- F. Helps patients get treatments they wouldn't get otherwise.
- G. Interferes with good relationships between doctors and patients.
- H. Challenges doctors to be more up-to-date with the latest treatments.
- I. Causes patients to take up more of their doctor's time.

A414/415 Overall, do you feel that your access to health information on the Internet has helped, hurt, or made no difference to (READ EACH ITEM)?

- A. How well you communicate with your doctor.
- B. How confident you are with making decisions about your health care.
- C. How well you take care of your health.
- D. How much you understand conditions or treatments.

Q416/417 Have you ever (READ EACH ITEM) mostly due to or partly due to something you saw on the Internet, or not?

- A. Taken an over-the-counter medicine or supplement, for example, vitamins, minerals, or nutritional supplements.
- B. Asked your doctor for a prescription drug.
- C. Started an alternative or complementary treatment, for example, massage or acupuncture.
- D. Made an appointment with a doctor for a check-up.
- E. Requested preventative care like a screening or blood test.
- F. Changed your doctor, hospital, or other health-care provider.
- G. Talked to a health care professional about concerns or worries you have about a family member's or friend's health.

Q660 As a result of bringing this information to the doctor, do you think your relationship with this doctor has gotten a lot better, a little worse, a lot worse, or has it stayed the same?

Q654/655 How would you rate (READ EACH ITEM) when you brought the information to the visit? Excellent, very good, good, fair or poor?

- A. The amount of time the doctor spent discussing the information.
- B. How well he or she listened.
- C. How well he or she answered your questions.
- D. How open and receptive he or she was to the information.
- E. How seriously he or she considered the information.
- F. The doctor's decision or recommendation.
